# Supplementary material
Source: Springer Nature journal article supplement (https://www.springermedizin.de/resource/supplementary/12936_2011_1918_MOESM19_ESM.pdf/9541982)

# Number of *P. vivax* relapses

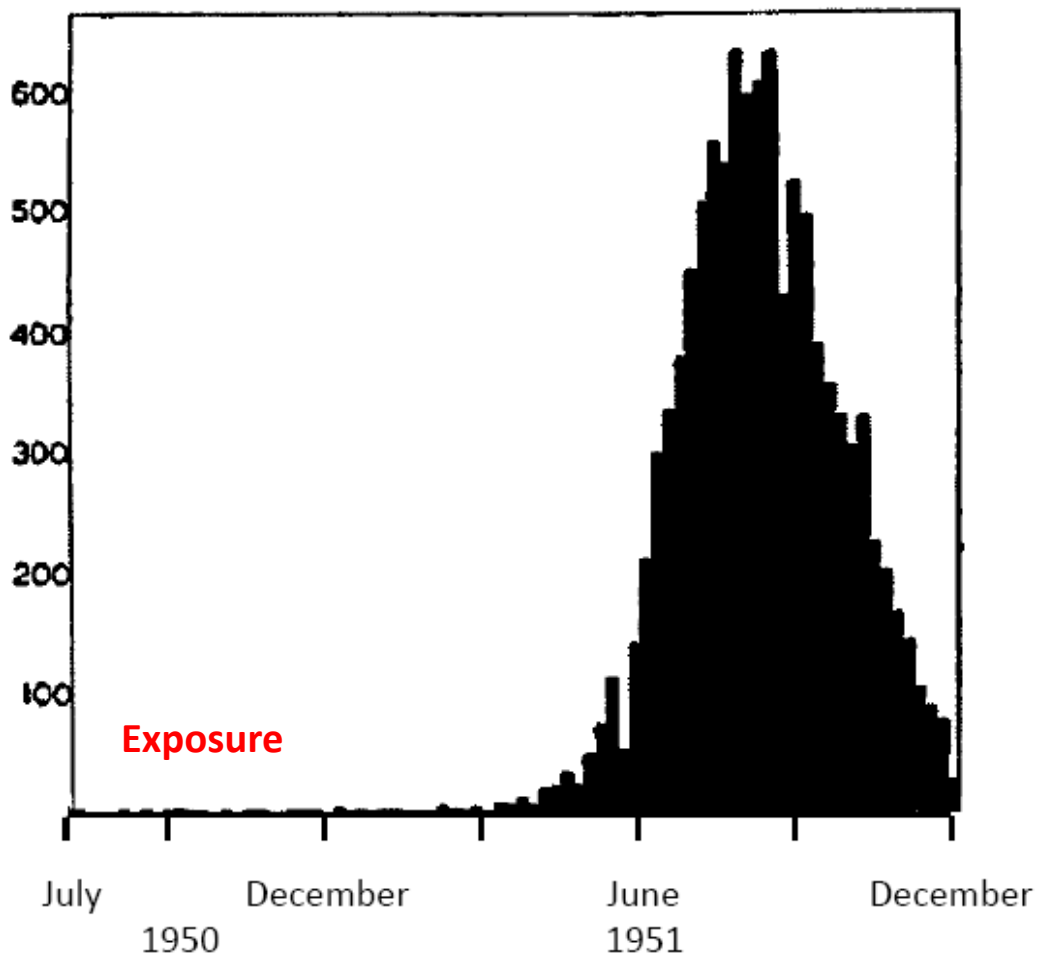

Supplement: MOESM19 [file 9541982]
